# Supplementary material for: Response of Rice Grain Yield and Soil Fertility to Fertilization Management under Three Rice-Based Cropping Systems in Reclaimed Soil
Source: MDPI journal article supplement (doi:10.3390/agronomy13071840), 2023-07-12
Supplement: s1 [file s1]

Table S1 Parameters for organic fertilizers (chicken manure, vermicompost, and rapeseed cake) used in the present study.

| Parameter                      | Chicken | Vermicompost | Rapeseed |
|--------------------------------|---------|--------------|----------|
| pH                             | 7.25    | 7.72         | 7.63     |
| carbon to nitrogen ratio (C/N) | 10.37   | 7.25         | 9.14     |
| total carbon (%)               | 16.60   | 14.50        | 38.10    |
| total nitrogen (%)             | 1.60    | 2.00         | 4.20     |
| available nitrogen (%)         | 0.23    | 0.25         | 0.47     |
| total phosphorus (%)           | 1.20    | 1.70         | 2.30     |
| available phosphorus (%)       | 0.37    | 0.52         | 0.85     |
| total potassium (%)            | 0.70    | 1.00         | 1.60     |
| available potassium (%)        | 0.59    | 0.83         | 1.33     |

Table S2 Soil chemical properties and enzymes. TN, total nitrogen; TC, total carbon; C/N, carbon to nitrogen ratio; AN, Alkali-hydrolyzable N;  $N_{NH_4^+}$ , ammoniacal N;  $N_{NO_3^-}$ , nitrate nitrogen; TP, total P; AK, available K; CEC, cation exchange capacity; S\_SC, sucrase, S\_EC, cellulase; S\_CAT, catalase; S\_NR, nitrate reductase; S\_AKP, alkaline phosphatase; the same below.

| Treatments | TN                | TC                | C/N         | AN            | $N_{NH_4^+}$ | $N_{NO_3^-}$ | TOC         | TP           | AP           | AK           | CEC          | S_SC        | S_EC           | S_CAT        | S_NR         | S_AKP       |
|------------|-------------------|-------------------|-------------|---------------|--------------|--------------|-------------|--------------|--------------|--------------|--------------|-------------|----------------|--------------|--------------|-------------|
| RW         |                   |                   |             |               |              |              |             |              |              |              |              |             |                |              |              |             |
| CK1        | 0.40±0.03<br>e    | 6.50±0.25<br>cde  | 17.62±3.08a | 55.47±3.70def | 16.04±0.88g  | 10.80±0.65d  | 4.82±0.12de | 0.28±0.02ef  | 8.83±0.47f   | 181.61±2.89g | 17.81±0.44f  | 45.21±0.47f | 609.95±6.30g   | 58.54±0.50a  | 29.72±3.37bc | 5.76±0.07de |
| CK2        | 0.56±0.05<br>bcde | 6.88±0.02<br>bcde | 12.57±1.11b | 56.48±0.09def | 17.36±0.07fg | 11.29±0.25cd | 5.22±0.11cd | 0.29±0.01de  | 10.36±0.51ef | 196.55±0.38e | 19.85±0.51de | 43.71±0.31f | 630.74±12.27fg | 57.33±0.20c  | 31.87±0.57bc | 4.10±0.02f  |
| Chicken    | 0.70±0.01<br>ab   | 8.00±0.03<br>ab   | 11.49±0.07b | 76.44±2.73b   | 16.09±0.43g  | 12.67±0.33c  | 7.18±0.24a  | 0.32±0.01bcd | 17.34±1.53bc | 214.40±0.92d | 21.63±0.05c  | 70.58±0.48c | 803.99±17.32cd | 58.55±0.14ab | 29.14±0.35bc | 4.05±0.08f  |

|                  |                   |                   |                 |                   |                   |                  |                 |                  |                    |                   |                  |                  |                    |                  |                  |                  |
|------------------|-------------------|-------------------|-----------------|-------------------|-------------------|------------------|-----------------|------------------|--------------------|-------------------|------------------|------------------|--------------------|------------------|------------------|------------------|
| Vermico<br>mpost | 0.68±0.02<br>abc  | 7.40±0.03<br>ab   | 11.06±0.<br>23b | 68.29±0.6<br>0c   | 18.74±0.5<br>1def | 11.49±0.<br>11cd | 5.43±0.<br>10c  | 0.33±0.0<br>0abc | 15.48±0.64<br>bcd  | 184.57±1.<br>02fg | 21.71±0.<br>20bc | 83.17±1.<br>95b  | 1151.21±6.<br>79a  | 28.79±0.<br>02a  | 50.21±0.<br>89a  | 7.77±0.0<br>7a   |
| Rapeseed         | 0.59±0.01<br>bcd  | 7.30±0.03<br>ab   | 12.42±0.<br>24b | 88.11±1.5<br>0a   | 21.06±0.1<br>2abc | 21.71±0.<br>20b  | 6.46±0.<br>16b  | 0.36±0.0<br>1ab  | 29.14±0.36<br>a    | 246.64±2.<br>58b  | 23.38±0.<br>31a  | 103.79±1<br>.06a | 1026.44±0.<br>43b  | 59.12±0.<br>11a  | 31.84±0.<br>33bc | 5.71±0.0<br>2e   |
| RG               |                   |                   |                 |                   |                   |                  |                 |                  |                    |                   |                  |                  |                    |                  |                  |                  |
| CK1              | 0.54±0.18<br>bcde | 6.80±1.50<br>bcde | 13.07±1.<br>45b | 49.41±3.3<br>6f   | 17.35±0.0<br>8fg  | 8.72±0.2<br>6f   | 3.62±0.<br>01g  | 0.23±0.0<br>2g   | 13.42±0.94<br>cdef | 183.32±1.<br>07g  | 19.83±0.<br>74de | 55.75±0.<br>29de | 515.16±23.<br>68h  | 55.11±0.<br>06e  | 34.69±2.<br>70b  | 3.83±0.0<br>5fg  |
| CK2              | 0.66±0.01<br>abc  | 8.35±0.10<br>a    | 12.70±0.<br>09b | 52.91±2.3<br>6ef  | 19.33±1.0<br>6def | 9.12±0.3<br>4ef  | 4.11±0.<br>17fg | 0.25±0.0<br>2fg  | 14.13±1.27<br>cde  | 192.79±2.<br>06ef | 20.36±0.<br>19cd | 55.46±0.<br>77de | 619.92±31.<br>49fg | 56.41±0.<br>07d  | 45.64±2.<br>18a  | 5.66±0.0<br>8e   |
| Chicken          | 0.51±0.05<br>cde  | 6.05±0.00<br>def  | 11.95±1.<br>22b | 57.25±1.3<br>5def | 19.86±0.1<br>0cde | 8.84±0.6<br>2ef  | 4.28±0.<br>02ef | 0.29±0.0<br>3de  | 13.38±1.49<br>cdef | 198.40±1.<br>96e  | 20.54±0.<br>09cd | 57.14±1.<br>18de | 630.22±28.<br>27fg | 59.08±0.<br>49a  | 27.46±1.<br>92c  | 6.35±0.1<br>6c   |
| Vermico<br>mpost | 0.53±0.04<br>bcde | 5.80±0.00<br>ef   | 11.09±0.<br>91b | 62.39±1.7<br>9cd  | 20.67±0.3<br>1bcd | 12.53±0.<br>51c  | 3.59±0.<br>03g  | 0.35±0.0<br>4ab  | 19.27±2.07<br>b    | 216.09±4.<br>19d  | 20.48±0.<br>53cd | 58.44±0.<br>07de | 754.86±46.<br>38de | 59.31±0.<br>06a  | 48.89±2.<br>80a  | 7.43±0.2<br>8ab  |
| Rapeseed         | 0.61±0.02<br>bcd  | 6.90±0.05<br>bcde | 11.37±0.<br>34b | 60.23±1.5<br>9de  | 22.02±0.6<br>6abc | 24.70±0.<br>25a  | 5.20±0.<br>04cd | 0.37±0.0<br>2a   | 15.93±0.23<br>bcd  | 229.12±2.<br>61c  | 20.68±0.<br>08cd | 59.82±0.<br>89d  | 597.22±2.6<br>2g   | 59.19±0.<br>03a  | 34.84±3.<br>38b  | 5.97±0.1<br>8cde |
| RF               |                   |                   |                 |                   |                   |                  |                 |                  |                    |                   |                  |                  |                    |                  |                  |                  |
| CK1              | 0.46±0.01<br>de   | 5.08±0.18<br>f    | 11.16±0.<br>33b | 56.52±2.0<br>6def | 18.16±0.0<br>0efg | 9.15±0.0<br>7ef  | 4.82±0.<br>14de | 0.29±0.0<br>1de  | 11.60±1.84<br>def  | 184.25±2.<br>12fg | 16.53±0.<br>01g  | 27.94±0.<br>78g  | 360.21±10.<br>30i  | 57.43±0.<br>26c  | 31.99±1.<br>27bc | 3.35±0.0<br>6g   |
| CK2              | 0.80±0.00<br>a    | 8.60±0.05<br>a    | 10.77±0.<br>06b | 62.39±1.0<br>7cd  | 20.43±0.3<br>8bcd | 10.22±0.<br>54de | 4.88±0.<br>03cd | 0.31±0.0<br>1cde | 14.18±0.84<br>cde  | 213.44±0.<br>76d  | 17.94±0.<br>31f  | 31.01±1.<br>52g  | 372.21±19.<br>68i  | 57.56±0.<br>11c  | 34.39±1.<br>08b  | 3.70±0.1<br>3fg  |
| Chicken          | 0.69±0.01<br>abc  | 7.63±0.58<br>ab   | 11.25±0.<br>88b | 76.99±0.7<br>5b   | 22.04±0.0<br>6abc | 12.62±0.<br>05c  | 6.52±0.<br>05b  | 0.36±0.0<br>2ab  | 14.54±0.80<br>bcde | 228.08±2.<br>04c  | 18.76±0.<br>32ef | 53.26±1.<br>39e  | 801.83±38.<br>11cd | 57.89±0.<br>23bc | 43.66±2.<br>19a  | 6.91±0.2<br>8b   |
| Vermico<br>mpost | 0.61±0.05<br>bcd  | 7.65±0.00<br>ab   | 12.74±0.<br>94b | 76.15±0.8<br>8b   | 22.26±1.1<br>8ab  | 10.60±0.<br>63d  | 4.96±0.<br>01cd | 0.34±0.0<br>5ab  | 17.88±1.36<br>bc   | 263.20±2.<br>92a  | 20.52±0.<br>56cd | 55.01±1.<br>03de | 700.02±32.<br>73ef | 57.96±0.<br>04bc | 44.80±0.<br>85a  | 5.91±0.2<br>4cde |

|          |           |           |          |           |           |          |         |          |            |           |          |          |            |          |          |          |
|----------|-----------|-----------|----------|-----------|-----------|----------|---------|----------|------------|-----------|----------|----------|------------|----------|----------|----------|
| Rapeseed | 0.61±0.01 | 7.75±0.05 | 12.71±0. | 77.83±0.7 | 23.26±0.7 | 12.48±0. | 6.65±0. | 0.36±0.0 | 14.67±1.70 | 255.97±4. | 22.96±0. | 66.66±3. | 869.07±6.6 | 59.19±0. | 30.55±1. | 6.30±0.3 |
|          | bcd       | ab        | 13b      | 8b        | 2a        | 28c      | 03b     | 1ab      | bcde       | 05a       | 45ab     | 14c      | 9c         | 14a      | 48bc     | 4cd      |

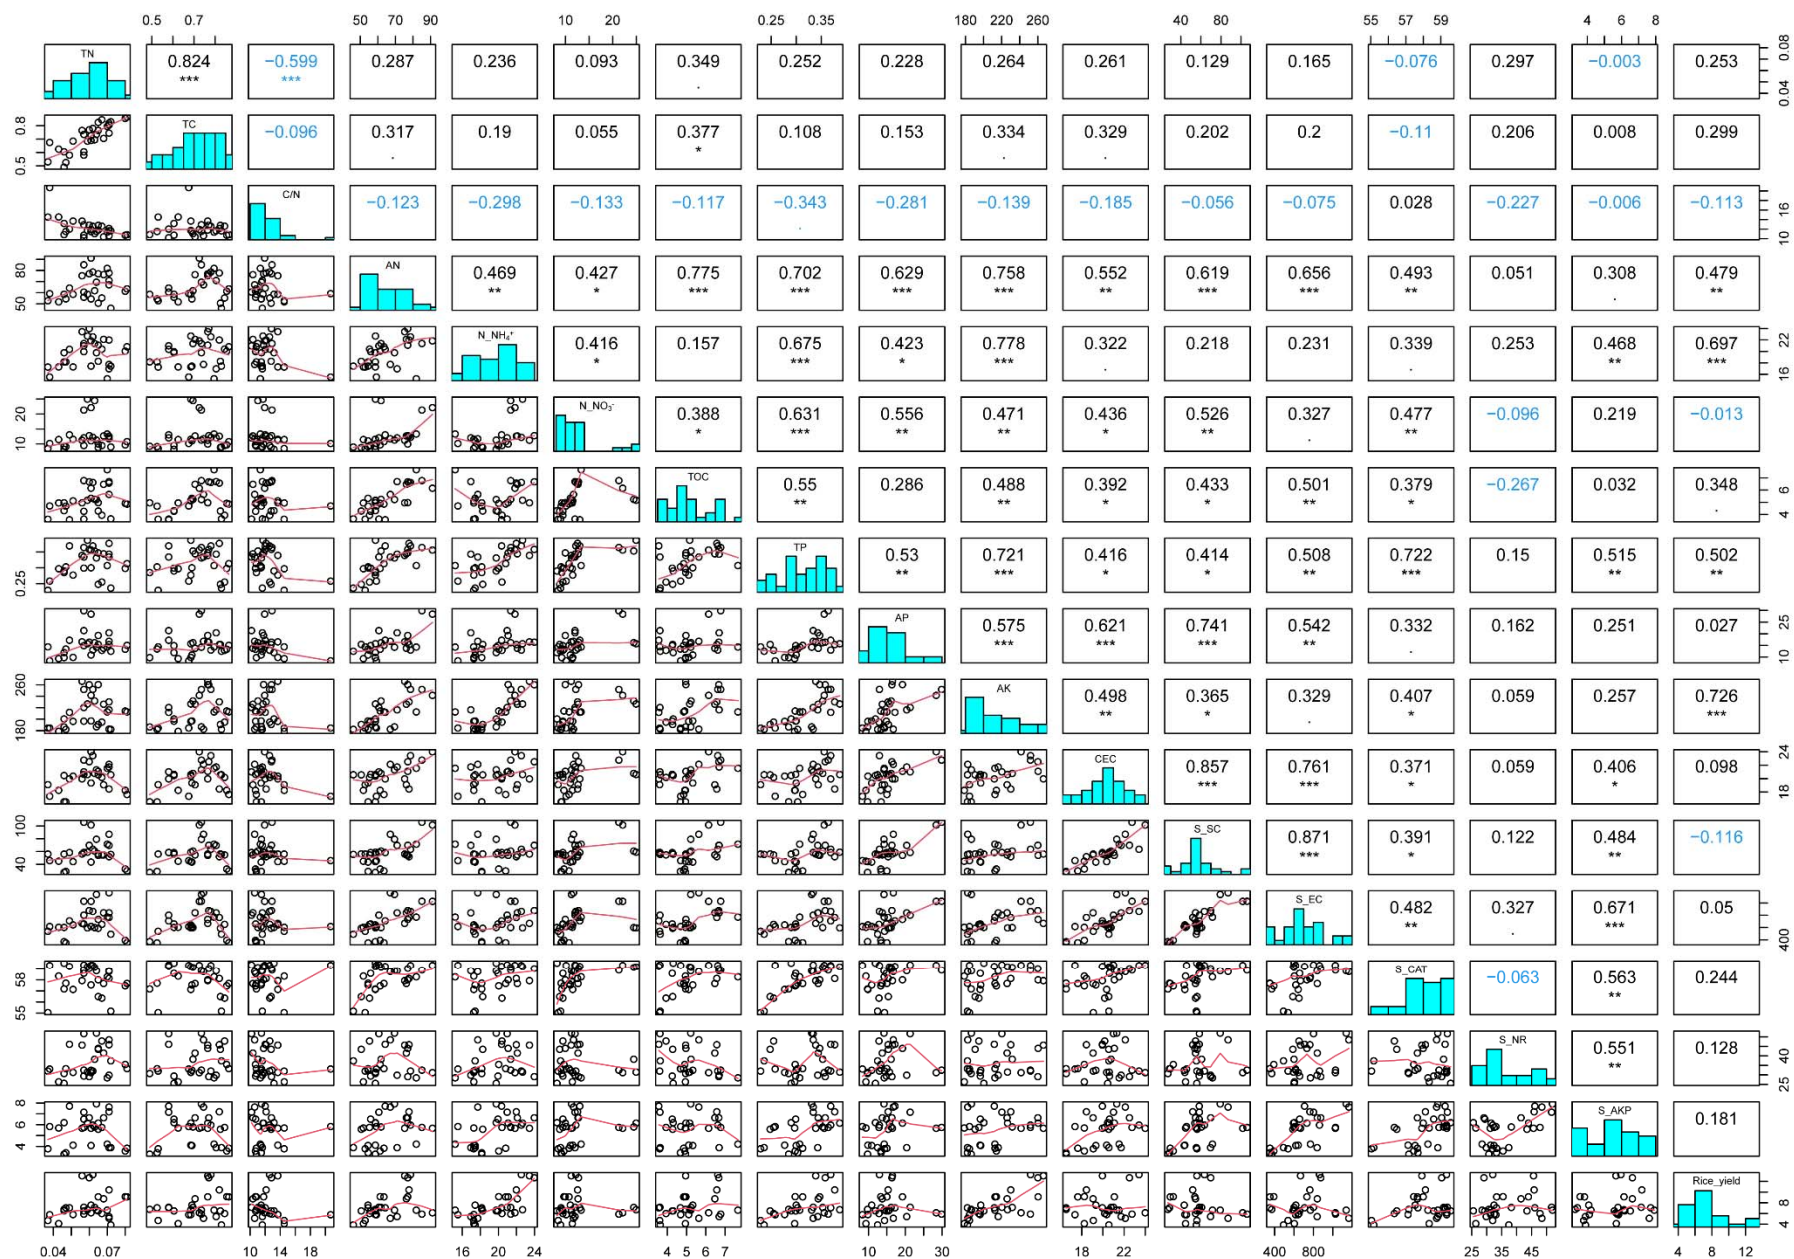

Figure S1. Relationships between rice grain yield and soil fertility. \*\*\*,  $P < 0.001$ , \*\*,  $P < 0.01$ , \*,  $P < 0.05$ .

(a) RW\_Chemical

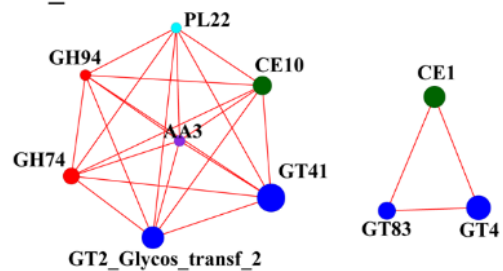

(b) RW\_Organic

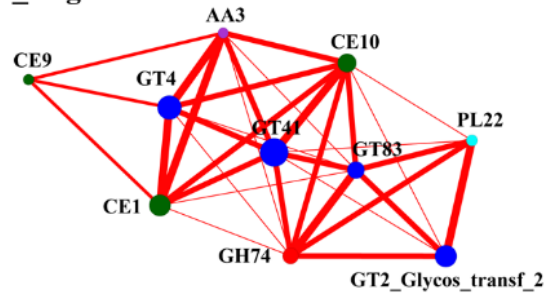

(c) RG\_Chemical

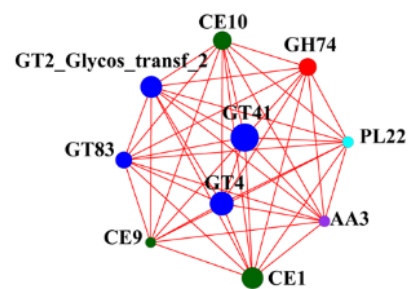

(d) RG\_Organic

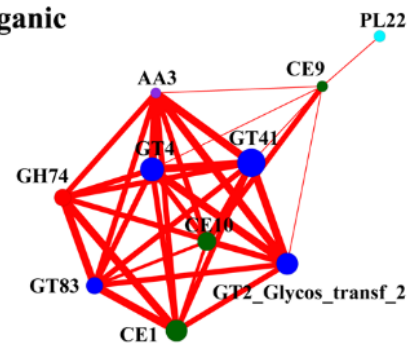

(e) RF\_Chemical

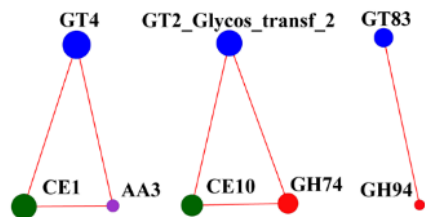

(f) RF\_Organic

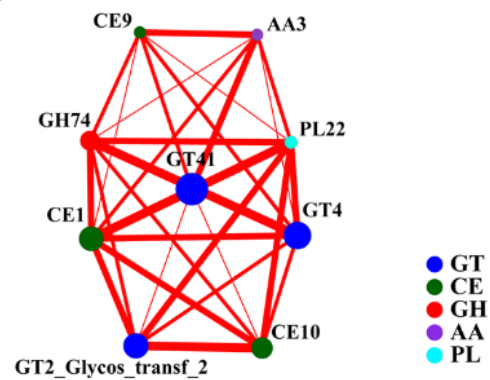

**Figure S2** Network analysis within slow-release fertilizer treatments (Chemical) and organic fertilizer treatments (Organic) respectively, red line indicates positive relationship. The size of the nodes in the figure represents the abundance of function, with larger nodes corresponding to larger abundance values; all nodes are displayed in the same color. The color of the lines represents positive or negative correlations: red indicates a positive correlation between functions, and green indicates a negative correlation between functions; the thickness of the lines represents the size of the correlation coefficient values, with thicker lines indicating higher correlations between functions; the more lines there are, the more closely related the function is to other functions.
